# Supplementary material
Source: publisher figshare collection journal article supplement (https://frontiersin.figshare.com/ndownloader/files/12981443)
Supplement: Supplementary file 1 [file 12981443]

**Table S1.** Spectral data of the isolated compounds **1-10**

Compound **1**. m.p.: 211-212°C; UV  $\lambda_{\max}$  nm (MeOH) : 354 ( $\epsilon$  8,080), 325 ( $\epsilon$  8,320), 272 ( $\epsilon$  14,000); LC-ESI-MS (positive mode):  $m/z$  641.1721  $[M+H]^+$ ;  $^1H$  NMR (500 MHz,  $CD_3OD$ ):  $\delta$  (ppm) 3.2-3.8 (sugar protons), 3.89 (3H, s, -OMe), 4.76 (1H, *d*,  $J=7.5$  Hz, H-1'''), 5.45 (1H, *d*,  $J=7.6$  Hz, H-1''), 6.25 (1H, s, H-6), 6.93 (2H, *d*,  $J=9.0$  Hz, H-3', 5'), 8.11 (2H, *d*,  $J=8.9$  Hz, H-2', 6'),  $^{13}C$  NMR (125 MHz,  $CD_3OD$ ):  $\delta$  (ppm) 62.0 (-OMe), 62.7 (C-6'', 6'''), 62.8 (C-4'', 4'''), 71.4 (C-3''), 71.5 (C-2'''), 75.5 (C-3'''), 78.1 (C-5'''), 78.5 (C-5''), 82.8 (C-2''), 100.6 (C-6), 101.2 (C-1''), 104.9 (C-1'''), 105.5 (C-10), 116.5 (C-3', 5'), 123.1 (C-1'), 129.5 (C-8), 132.5 (C-2', 6'), 135.1 (C-3), 150.6 (C-9), 158.3 (C-2,7), 158.6 (C-5), 161.8 (C-4'), 179.9 (C-4)

Compound **2**.  $^1H$  NMR (400 MHz,  $CD_3OD$ ):  $\delta$  (ppm) 3.64 (1H, *d*,  $J=2.6$  Hz) , 3.69 (1H, *dd*,  $J=4.8$ , 12.1 Hz, H-6') , 3.85 (1H, *dd*,  $J=2.0$ , 12.2 Hz, H-6') , 3.90 (3H, s, H-10) , 5.57 (1H, *d*,  $J=7.9$  Hz, H-1') , 6.40 (1H, *d*,  $J=15.9$  Hz, H-2) , 6.82 (1H, *d*,  $J=8.2$  Hz, H-8) , 7.10 (1H, *dd*,  $J=1.9$ , 8.2 Hz, H-9) , 7.21 (1H, *d*,  $J=1.9$  Hz, H-5), 7.72 (1H, *d*,  $J=15.9$  Hz, H-3)

Compound **3**.  $^1H$  NMR (400 MHz,  $CD_3OD$ ):  $\delta$  (ppm) 3.69 (1H, *dd*,  $J=5.0$ , 12.0 Hz) , 3.83 (1H, *dd*,  $J=2.2$ , 12.2 Hz) , 3.88 (3H, s, H-10) , 5.56 (1H, *d*,  $J=8.1$  Hz, H-1') , 5.82 (1H, *d*,  $J=12.9$  Hz, H-2) , 6.76 (1H, *d*,  $J=8.3$  Hz, H-8) , 6.94 (1H, *d*,  $J=13.0$  Hz, H-3) , 7.17 (1H, *dd*,  $J=2.0$ , 8.3 Hz, H-9), 7.88 (1H, *d*,  $J=1.8$  Hz, H-5)

Compound **4**. UV  $\lambda_{\max}$  nm (MeOH): 274; LC-MS: positive mode  $m/z$  584.2769  $[M+H]^+$ ;  $^1H$  NMR (400 MHz,  $CD_3OD$ ):  $\delta$  (ppm) 1.40-1.90 (3H, *m*, H-3, 7, 8), 3.10-3.20 (2H, *m*, H-2, 9), 3.25-3.40 (2H, *m*, H-4, 6), 5.85 (3H, *dd*,  $J=12.6$  Hz, H-8', 8'', 8'''), 6.60 (3H, *dd*,  $J=12.5$  Hz, H-7', 7'', 7'''), 6.70-6.82 (6H, *m*,  $J=8.6$  Hz, H-3', 3'', 3''', 5', 5'', 5'''), 7.21 (2H, *m*, H-2', 6''), 7.39 (4H, *d*,  $J=8.7$  Hz, H-2'', 6', 2''', 6''')

Compound **5**. UV  $\lambda_{\max}$  nm (MeOH): 285; LC-MS: positive mode  $m/z$  584.2758  $[M+H]^+$ ;  $^1H$  NMR (400 MHz,  $CD_3OD$ ):  $\delta$  (ppm) 1.44-1.90 (6H, *m*, H-3, 7, 8), 3.10-3.30 (4H, *m*, H-2, 9), 3.35-3.50 (4H, *m*, H-4, 6), 5.86 (4H, *dd*,  $J=12.6$  Hz, 8', H-8'', 8'''), 6.38 (2H, *dd*,  $J=15.7$  Hz, H-8', 8'''), 6.60 (4H, *dd*,  $J=12.4$  Hz, H-7', 7'', 7'''), 6.70-6.81 (12H, *m*,  $J=8.6$  Hz, H-3', 3'', 3''', 5', 5'', 5'''), 7.22 (4H, *m*, H-2'', 6''), 7.39 (8H, *d*,  $J=8.6$  Hz, H-2', 6', 2''', 6'''), 7.45 (2H, *dd*,  $J=15.7$  Hz, H-7', 7''')

Compound **6**. UV  $\lambda_{\max}$  nm (MeOH): 307, 292; LC-MS: positive mode  $m/z$  584.2761  $[M+H]^+$ ;  $^1H$  NMR (400 MHz,  $CD_3OD$ ):  $\delta$  (ppm) 1.44-1.90 (3H, *m*, H-3, 7, 8), 3.20-3.30 (2H, *m*, H-2, 9), 3.44-3.59 (2H, *m*, H-4, 6), 5.95 (1H, *dd*,  $J=12.7$  Hz, H-8''), 6.39 (2H, *dd*,  $J=15.7$  Hz, H-8', 8'''), 6.57 (1H, *dd*,  $J=12.7$  Hz, H-7''), 6.71 (2H, *m*,  $J=8.6$  Hz, H-3'', 5''), 6.78 (4H, *m*,  $J=8.6$  Hz, H-3', 5', 3''', 5'''), 7.22 (2H, *d*,  $J=8.6$  Hz, H-2'', 6''), 7.39 (4H, *d*,  $J=8.5$  Hz, H-2', 6', 2''', 6'''), 7.45 (2H, *dd*,  $J=15.7$  Hz, H-7', 7''')

Compound **7**. UV  $\lambda_{\max}$  nm (MeOH): 310, 299; LC-MS: positive mode  $m/z$  584.2761  $[M+H]^+$ ;  $^1H$  NMR (400 MHz,  $CD_3OD$ ):  $\delta$  (ppm) 1.59-1.74 (2H, *m*, H-7, 8), 1.83-1.92 (1H, *m*, H-3), 3.30-3.38 (2H, *m*, H-2, 9), 3.48-3.60 (2H, *m*, H-4, 6), 6.40 (2H, *dd*,  $J=15.7$ , 14.2 Hz, H-8', 8'''), 6.72 (2H, *d*,  $J=8.6$  Hz, H-3'', 5''), 6.79 (4H, *m*,  $J=8.6$  Hz, H-3', 5', 3''', 5'''), 6.86 (1H, *d*,  $J=15.3$  Hz, H-8''), 7.35 (2H, *d*,  $J=8.6$  Hz, H-2'', 6''), 7.41 (4H, *d*,  $J=8.6$  Hz, H-2', 6', 2''', 6'''), 7.43 (2H, *dd*,  $J=16.2$  Hz, H-7'), 7.45 (2H, *dd*,  $J=16.1$  Hz, H-7'''), 7.53 (2H, *dd*,  $J=15.2$  Hz, H-7'')

Compound **8**. UV  $\lambda_{\max}$  nm (MeOH): 279; LC-MS: positive mode  $m/z$  443.0978  $[M+H]^+$ ;  $^1H$  NMR (400 MHz,  $CD_3OD$ ):  $\delta$  (ppm) 2.85 (1H, *dd*,  $J=17.7$  Hz, H-4 $\alpha$ ), 3.00 (1H, *dd*,  $J=17.3$ , 4.5 Hz, H-4 $\beta$ ), 5.03 (1H, s, H-2), 5.52 (1H, *m*, H-3), 5.95 (2H, s, H-6, 8), 6.69 (1H, *d*,  $J=8.2$  Hz, H-5'), 6.80 (1H, *dd*,  $J=8.37$ , 1.84 Hz, H-5''), 6.92 (1H, *d*,  $J=1.88$ , H-2'), 6.95 (2H, s, H-2'', 6'')

Compound **9**. UV  $\lambda_{\max}$  nm (MeOH): 311, 296; LC-MS: positive mode  $m/z$  600.2710  $[M+H]^+$ ;  $^1H$  NMR (400 MHz,  $CD_3OD$ ):  $\delta$  (ppm) 1.56-2.00 (3H, *m*, H-3, 7, 8), 3.30-3.90 (4H, *m*, H-2, 4, 6, 9), 6.40 (3H, *dd*,  $J=15.7$  Hz, H-8', 8'', 8'''), 6.39 (2H, *dd*,  $J=15.7$  Hz, H-8', 8'''), 6.57 (1H, *dd*,  $J=12.7$  Hz, H-7''), 6.71 (2H, *m*,  $J=8.6$  Hz, H-3'', 5''), 6.72 (1H, *d*,  $J=8.3$  Hz, H-5''), 6.77 (4H, *m*, H-3', 5', 3''', 5'''), 6.96 (1H, *dd*,  $J=8.3$  Hz, H-6'), 7.08 (1H, *d*,  $J=1.6$  Hz, H-2'), 7.38 (4H, *m*,  $J=8.6$  Hz, H-2'', 2''', 6', 6'''), 7.46 (3H, *dd*,  $J=15.6$  Hz, H-7', 7'', 7''')

Compound **10**. LC-MS: positive mode  $m/z$  291.0869  $[M+H]^+$ ;  $^1H$  NMR (400 MHz,  $CD_3OD$ ):  $\delta$  (ppm) 2.50 (1, *dd*,  $J=16.1$ , 8.2 Hz, H-4 $\beta$ ), 2.84 (1H, *dd*,  $J=16.1$ , 5.4 Hz, H-4 $\alpha$ ), 4.46 (1H, *d*, H-2), 5.85 (1H, *d*,  $J=2.3$  Hz, H-8), 5.92 (1H, *d*,  $J=2.3$  Hz, H-6), 6.71 (1H, *d*,  $J=8.2$  Hz, H-5'), 6.76 (1H, *dd*,  $J=8.1$ , 2.4 Hz, H-6'), 6.83 (1H, *d*,  $J=1.9$ , H-2')
